# Supplementary material for: Constructing Mixed Density Functionals for Describing Dissociative Chemisorption on Metal Surfaces: Basic Principles
Source: PubMed Central journal article supplement (PMC10726370; doi:10.1021/acs.jpca.3c01932), 2023-12-05
Supplement: jp3c01932_si_001.pdf [file jp3c01932_si_001.pdf]

**Supporting Information for :**  
**Constructing Mixed Density Functionals for**  
**Describing Dissociative Chemisorption on Metal**  
**Surfaces: Basic Principles.**

Théophile Tchakoua,<sup>†</sup> Tim Jansen,<sup>†</sup> Youri van Nies,<sup>†</sup> Rebecca F. A. van den Elshout,<sup>‡</sup> Bart A. B. van Boxmeer,<sup>¶</sup> Saskia P. Poort,<sup>‡</sup> Michelle G. Ackermans,<sup>‡</sup> Gabriel Spiller Beltrão,<sup>‡</sup> Stefan A. Hildebrand,<sup>†</sup> Steijn E. J. Beekman,<sup>†</sup> Thijs van der Drift,<sup>†</sup> Sam Kaart,<sup>†</sup> Anthonie Šantić,<sup>†</sup> Esmee E. Spuijbroek,<sup>‡</sup> Nick Gerrits,<sup>†</sup>  
Mark F. Somers,<sup>†</sup> and Geert-Jan Kroes<sup>\*,†</sup>

<sup>†</sup>*Leiden Institute of Chemistry, Gorlaeus Laboratories, Leiden University, P.O. Box 9502,  
2300 RA Leiden, The Netherlands*

<sup>‡</sup>*Department of Chemical Engineering, Delft University of Technology, 2629 HZ Delft, The  
Netherlands*

<sup>¶</sup>*University of Antwerp, Faculty of Applied Engineering, Groenenborgerlaan 171, 2020  
Antwerpen, Belgium*

E-mail: \*g.j.kroes@chem.leidenuniv.nl

Phone: +31 71 527 4396

Table **S1**: Measured zero-point-energy-corrected and computed equilibrium lattice constants  $a$  of the fcc metals Ag, Cu, Ir, Ni, and Pt, and  $a$  and  $c$  of the hcp metal Ru are presented. The computed values have been calculated with the SRP $\boldsymbol{x}$  and SRP $\boldsymbol{x}$ sol DFs varying  $\boldsymbol{x}$  by steps  $\Delta\boldsymbol{x}$  of 0.1.

| Metal                    | Ag                 | Cu                 | Ir                 | Ni                 | Pt                 | Ru                 |                    |
|--------------------------|--------------------|--------------------|--------------------|--------------------|--------------------|--------------------|--------------------|
|                          | $a$                | $a$                | $a$                | $a$                | $a$                | $a$                | $c$                |
| Experimental             | 4.062 <sup>1</sup> | 3.597 <sup>1</sup> | 3.831 <sup>1</sup> | 3.499 <sup>1</sup> | 3.912 <sup>1</sup> | 2.703 <sup>2</sup> | 4.274 <sup>2</sup> |
| SRP $\boldsymbol{x}$     |                    |                    |                    |                    |                    |                    |                    |
| PBE                      | 4.147              | 3.635              | 3.873              | 3.518              | 3.968              | 2.721              | 4.293              |
| $\boldsymbol{x}$ =0.1    | 4.153              | 3.639              | 3.874              | 3.521              | 3.970              | 2.722              | 4.295              |
| $\boldsymbol{x}$ =0.2    | 4.159              | 3.644              | 3.875              | 3.524              | 3.972              | 2.723              | 4.297              |
| $\boldsymbol{x}$ =0.3    | 4.165              | 3.648              | 3.877              | 3.528              | 3.974              | 2.725              | 4.299              |
| $\boldsymbol{x}$ =0.4    | 4.172              | 3.652              | 3.878              | 3.531              | 3.976              | 2.726              | 4.301              |
| $\boldsymbol{x}$ =0.5    | 4.178              | 3.657              | 3.880              | 3.535              | 3.979              | 2.727              | 4.303              |
| $\boldsymbol{x}$ =0.6    | 4.185              | 3.661              | 3.882              | 3.539              | 3.981              | 2.728              | 4.305              |
| $\boldsymbol{x}$ =0.7    | 4.191              | 3.666              | 3.883              | 3.542              | 3.983              | 2.730              | 4.307              |
| $\boldsymbol{x}$ =0.8    | 4.198              | 3.670              | 3.885              | 3.546              | 3.985              | 2.731              | 4.308              |
| $\boldsymbol{x}$ =0.9    | 4.205              | 3.675              | 3.886              | 3.550              | 3.988              | 2.732              | 4.310              |
| RPBE                     | 4.213              | 3.679              | 3.888              | 3.553              | 3.990              | 2.733              | 4.312              |
| SRP $\boldsymbol{x}$ sol |                    |                    |                    |                    |                    |                    |                    |
| PBEsol                   | 4.035              | 3.559              | 3.822              | 3.454              | 3.902              | 2.683              | 4.237              |
| $\boldsymbol{x}$ =0.1    | 4.051              | 3.570              | 3.828              | 3.464              | 3.910              | 2.688              | 4.244              |
| $\boldsymbol{x}$ =0.2    | 4.067              | 3.581              | 3.834              | 3.473              | 3.918              | 2.693              | 4.252              |
| $\boldsymbol{x}$ =0.3    | 4.083              | 3.593              | 3.841              | 3.482              | 3.927              | 2.698              | 4.260              |
| $\boldsymbol{x}$ =0.4    | 4.099              | 3.604              | 3.847              | 3.492              | 3.935              | 2.704              | 4.268              |
| $\boldsymbol{x}$ =0.5    | 4.117              | 3.616              | 3.854              | 3.502              | 3.944              | 2.709              | 4.275              |
| $\boldsymbol{x}$ =0.6    | 4.134              | 3.628              | 3.860              | 3.512              | 3.953              | 2.714              | 4.283              |
| $\boldsymbol{x}$ =0.7    | 4.152              | 3.641              | 3.867              | 3.522              | 3.962              | 2.719              | 4.290              |
| $\boldsymbol{x}$ =0.8    | 4.172              | 3.653              | 3.874              | 3.532              | 3.971              | 2.723              | 4.298              |
| $\boldsymbol{x}$ =0.9    | 4.192              | 3.666              | 3.881              | 3.543              | 3.980              | 2.728              | 4.305              |
| RPBE                     | 4.213              | 3.679              | 3.888              | 3.553              | 3.990              | 2.733              | 4.312              |

Table **S2**: Calculated barrier heights  $E_b$  computed with limiting forms of the mixed DFs are shown for the 16 systems present in the SBH16 database, as calculated for the PBE, the RPBE, the PBEsolc, the PBE-vdW1, the PBE-vdW2, and the PBE $\alpha$ -vdW1 DF with  $\alpha=0.57$ . Also presented are the values of the charge excitation parameter  $\Delta E_{CT}=\text{WF-EA}$ . The systems are arranged with the charge transfer parameter increasing from top to bottom.

| System                             | $E_b^{PBE}$ | $E_b^{RPBE}$ | $E_b^{PBEsolc}$ | $E_b^{PBE-vdW1}$ | $E_b^{PBE-vdW2}$ | $E_b^{PBE\alpha-vdW1}$ | WF-EA |
|------------------------------------|-------------|--------------|-----------------|------------------|------------------|------------------------|-------|
| $\text{N}_2+\text{Ru}(10\bar{1}0)$ | -0.096      | 0.469        | -0.999          | -0.023           | 0.247            | -0.314                 | 6.582 |
| $\text{N}_2+\text{Ru}(0001)$       | 1.532       | 1.965        | 0.896           | 1.688            | 1.746            | 1.314                  | 7.382 |
| $\text{H}_2+\text{Ag}(111)$        | 1.132       | 1.457        | 0.643           | 1.442            | 1.569            | 1.275                  | 7.685 |
| $\text{H}_2+\text{Cu}(110)$        | 0.639       | 0.874        | 0.346           | 0.914            | 0.996            | 0.792                  | 7.715 |
| $\text{H}_2+\text{Cu}(100)$        | 0.584       | 0.905        | 0.095           | 0.894            | 1.024            | 0.731                  | 7.885 |
| $\text{H}_2+\text{Cu}(111)$        | 0.463       | 0.760        | 0.026           | 0.771            | 0.886            | 0.617                  | 8.055 |
| $\text{H}_2+\text{Ni}(111)$        | 0.026       | 0.170        | -0.097          | -0.006           | 0.085            | -0.076                 | 8.395 |
| $\text{H}_2+\text{Ru}(0001)$       | 0.014       | 0.108        | -0.050          | -0.049           | 0.002            | -0.096                 | 8.555 |
| $\text{H}_2+\text{Pt}(111)$        | 0.018       | 0.169        | -0.103          | -0.005           | 0.063            | -0.079                 | 9.065 |
| $\text{CH}_4+\text{Ni}(211)$       | 0.675       | 0.973        | 0.349           | 0.603            | 0.777            | 0.448                  | 10.72 |
| $\text{CH}_4+\text{Ni}(100)$       | 0.912       | 1.259        | 0.491           | 0.843            | 1.020            | 0.664                  | 10.92 |
| $\text{CH}_4+\text{Ni}(111)$       | 1.010       | 1.349        | 0.594           | 0.962            | 1.156            | 0.785                  | 10.99 |
| $\text{CH}_4+\text{Ru}(0001)$      | 0.856       | 1.164        | 0.456           | 0.760            | 0.989            | 0.603                  | 11.15 |
| $\text{CH}_4+\text{Pt}(211)$       | 0.489       | 0.789        | 0.092           | 0.484            | 0.618            | 0.316                  | 11.39 |
| $\text{CH}_4+\text{Ir}(111)$       | 0.875       | 1.186        | 0.495           | 0.714            | 0.894            | 0.550                  | 11.53 |
| $\text{CH}_4+\text{Pt}(111)$       | 0.819       | 1.151        | 0.414           | 0.775            | 0.898            | 0.604                  | 11.66 |

Table **S3**: Calculated barrier heights  $E_b$  computed with limiting forms of the mixed DFs are shown for the 16 systems present in the SBH16 database, as calculated for the the PBE $\alpha$ -vdW1 DF with  $\alpha=0.57$ , the RPBE-vdW1 DF, the RPBE-vdW2 DF, and the PBEsol-vdW2 DF. Also presented are the values of the charge excitation parameter  $\Delta E_{CT}=\text{WF-EA}$ . The systems are arranged with the charge transfer parameter increasing from top to bottom.

| System                             | $E_b^{PBE\alpha-vdW2}$ | $E_b^{RPBE-vdW1}$ | $E_b^{RPBE-vdW2}$ | $E_b^{PBEsol-vdW2}$ | WF-EA |
|------------------------------------|------------------------|-------------------|-------------------|---------------------|-------|
| N <sub>2</sub> +Ru(10 $\bar{1}$ 0) | -0.044                 | 0.525             | 0.801             | -0.568              | 6.582 |
| N <sub>2</sub> +Ru(0001)           | 1.529                  | 2.133             | 2.367             | 1.113               | 7.382 |
| H <sub>2</sub> +Ag(111)            | 1.403                  | 1.758             | 1.885             | 1.114               | 7.685 |
| H <sub>2</sub> +Cu(110)            | 0.887                  | 1.144             | 1.239             | 0.714               | 7.715 |
| H <sub>2</sub> +Cu(100)            | 0.859                  | 1.205             | 1.332             | 0.564               | 7.885 |
| H <sub>2</sub> +Cu(111)            | 0.736                  | 1.064             | 1.183             | 0.470               | 8.055 |
| H <sub>2</sub> +Ni(111)            | -0.002                 | 0.134             | 0.209             | -0.045              | 8.395 |
| H <sub>2</sub> +Ru(0001)           | -0.044                 | 0.043             | 0.095             | -0.052              | 8.555 |
| H <sub>2</sub> +Pt(111)            | -0.012                 | 0.145             | 0.211             | -0.044              | 9.065 |
| CH <sub>4</sub> +Ni(211)           | 0.613                  | 0.907             | 1.076             | 0.433               | 10.72 |
| CH <sub>4</sub> +Ni(100)           | 0.829                  | 1.188             | 1.352             | 0.607               | 10.92 |
| CH <sub>4</sub> +Ni(111)           | 0.949                  | 1.305             | 1.473             | 0.713               | 10.99 |
| CH <sub>4</sub> +Ru(0001)          | 0.775                  | 1.063             | 1.235             | 0.565               | 11.15 |
| CH <sub>4</sub> +Pt(211)           | 0.474                  | 0.790             | 0.939             | 0.232               | 11.39 |
| CH <sub>4</sub> +Ir(111)           | 0.730                  | 1.030             | 1.210             | 0.501               | 11.53 |
| CH <sub>4</sub> +Pt(111)           | 0.726                  | 1.107             | 1.262             | 0.529               | 11.66 |

Table **S4**: The optimal mixing coefficient  $\boldsymbol{x}$  is shown for the mixed DFs SRP $\boldsymbol{x}$ , SRP $\boldsymbol{x}$ sol, SRP $\boldsymbol{x}$ -vdW1, and SRP $\boldsymbol{x}$ -vdW2. Also presented are the values of the charge excitation parameter  $\Delta E_{CT}=\text{WF-EA}$ . The systems are arranged with the charge transfer parameter increasing from top to bottom.

| System                              | WF-EA | SRP $\boldsymbol{x}$ | SRP $\boldsymbol{x}$ sol | SRP $\boldsymbol{x}$ -vdW1 | SRP $\boldsymbol{x}$ -vdW2 |
|-------------------------------------|-------|----------------------|--------------------------|----------------------------|----------------------------|
| N <sub>2</sub> + Ru(10 $\bar{1}$ 0) | 6.582 | 0.88                 | 0.95                     | 0.77                       | 0.27                       |
| N <sub>2</sub> + Ru(0001)           | 7.382 | 0.71                 | 0.88                     | 0.34                       | 0.01                       |
| H <sub>2</sub> + Ag(111)            | 7.685 | -0.15                | 0.53                     | -1.14                      | -1.55                      |
| H <sub>2</sub> + Cu(110)            | 7.715 | 0.64                 | 0.84                     | -0.55                      | -0.91                      |
| H <sub>2</sub> + Cu(100)            | 7.885 | 0.49                 | 0.79                     | -0.49                      | -0.91                      |
| H <sub>2</sub> + Cu(111)            | 8.055 | 0.55                 | 0.82                     | -0.49                      | -0.88                      |
| H <sub>2</sub> + Ni(111)            | 8.395 | -0.02                | 0.45                     | 0.21                       | -0.42                      |
| H <sub>2</sub> + Ru(0001)           | 8.555 | -0.09                | 0.34                     | 0.57                       | 0.02                       |
| H <sub>2</sub> + Pt(111)            | 9.065 | -0.17                | 0.34                     | -0.02                      | -0.48                      |
| CH <sub>4</sub> + Ni(211)           | 10.72 | 0.08                 | 0.57                     | 0.32                       | -0.24                      |
| CH <sub>4</sub> + Ni(100)           | 10.92 | -0.44                | 0.34                     | -0.24                      | -0.76                      |
| CH <sub>4</sub> + Ni(111)           | 10.99 | 0.01                 | 0.56                     | 0.27                       | -0.26                      |
| CH <sub>4</sub> + Ru(0001)          | 11.15 | -0.18                | 0.48                     | 0.13                       | -0.44                      |
| CH <sub>4</sub> + Pt(211)           | 11.39 | 0.23                 | 0.67                     | 0.32                       | -0.14                      |
| CH <sub>4</sub> + Ir(111)           | 11.53 | -0.12                | 0.49                     | 0.39                       | -0.18                      |
| CH <sub>4</sub> + Pt(111)           | 11.66 | 0.00                 | 0.54                     | 0.24                       | -0.17                      |

Table **S5**: The optimal mixing coefficient  $\boldsymbol{x}$  is shown for the mixed DFs SRP $\boldsymbol{x}$ sol-vdW2, SRP $\boldsymbol{x}$ -vdW1-ext, and SRP $\boldsymbol{x}$ -vdW2-ext. Also presented are the values of the charge excitation parameter  $\Delta E_{CT}=\text{WF-EA}$ . The systems are arranged with the charge transfer parameter (see Table **S4**) increasing from top to bottom.

| System                              | SRP $\boldsymbol{x}$ sol-vdW2 | SRP $\boldsymbol{x}$ -vdW1-ext | SRP $\boldsymbol{x}$ -vdW2-ext |
|-------------------------------------|-------------------------------|--------------------------------|--------------------------------|
| N <sub>2</sub> + Ru(10 $\bar{1}$ 0) | 0.70                          | 0.77                           | 0.27                           |
| N <sub>2</sub> + Ru(0001)           | 0.66                          | 0.34                           | 0.01                           |
| H <sub>2</sub> + Ag(111)            | -0.07                         | -0.90                          | -1.21                          |
| H <sub>2</sub> + Cu(110)            | 0.12                          | -0.46                          | -0.76                          |
| H <sub>2</sub> + Cu(100)            | 0.78                          | -0.42                          | -0.74                          |
| H <sub>2</sub> + Cu(111)            | 0.21                          | -0.42                          | -0.72                          |
| H <sub>2</sub> + Ni(111)            | 0.25                          | 0.21                           | -0.31                          |
| H <sub>2</sub> + Ru(0001)           | 0.34                          | 0.57                           | 0.02                           |
| H <sub>2</sub> + Pt(111)            | 0.15                          | -0.06                          | -0.42                          |
| CH <sub>4</sub> + Ni(211)           | 0.42                          | 0.32                           | -0.22                          |
| CH <sub>4</sub> + Ni(100)           | 0.19                          | -0.23                          | -0.60                          |
| CH <sub>4</sub> + Ni(111)           | 0.45                          | 0.27                           | -0.21                          |
| CH <sub>4</sub> + Ru(0001)          | 0.67                          | 0.13                           | -0.38                          |
| CH <sub>4</sub> + Pt(211)           | 0.50                          | 0.32                           | -0.15                          |
| CH <sub>4</sub> + Ir(111)           | 0.53                          | 0.39                           | -0.19                          |
| CH <sub>4</sub> + Pt(111)           | 0.55                          | 0.24                           | -0.21                          |

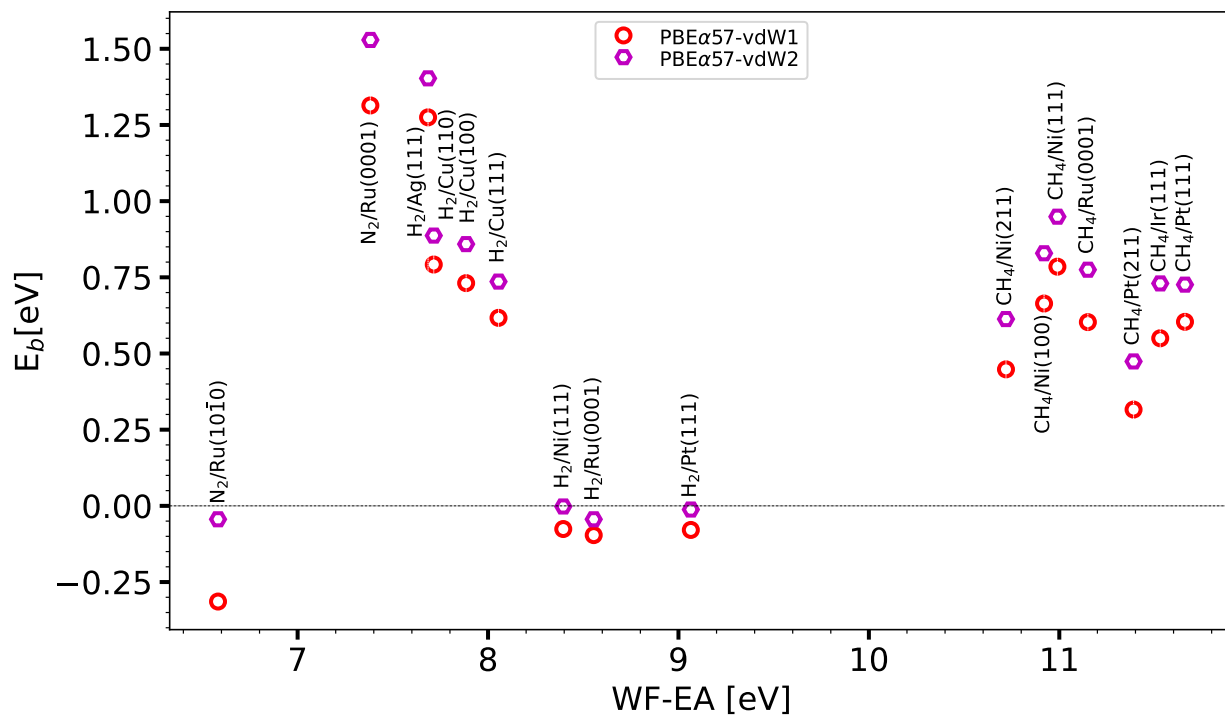

Figure S1: The barrier heights  $E_b$  computed with the PBE $\alpha$ -vdW1 and PBE $\alpha$ -vdW2 DFs with  $\alpha=0.57$  are shown as a function of the charge transfer parameter for the 16 systems present in the SBH16 database. These DFs may be viewed as the lower-limit expressions given by Eqs. 6b and 7b, respectively.

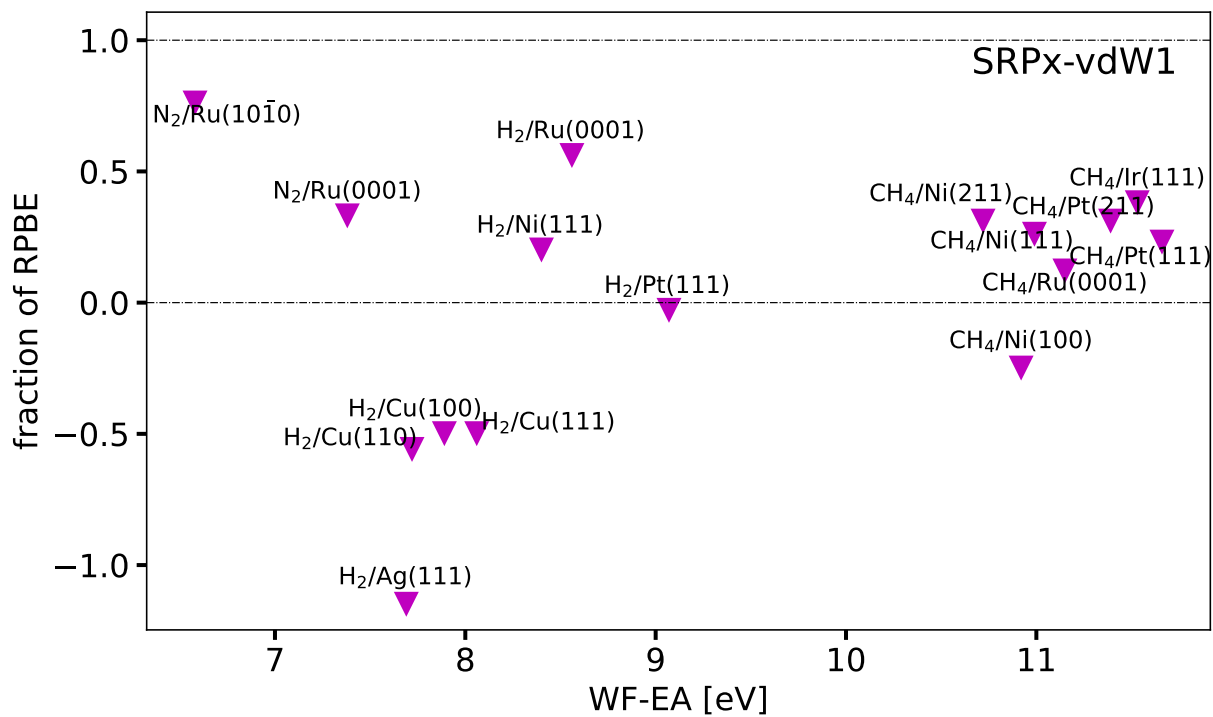

Figure S2: The optimum fraction of RPBE exchange  $\boldsymbol{x}$  is shown as a function of  $\Delta E_{CT}$  for the SRP $\boldsymbol{x}$ -vdW1 DF (Eq.3). Values falling between the two horizontal dot-dashed black lines could be obtained by the interpolation procedure illustrated in Figure 5.



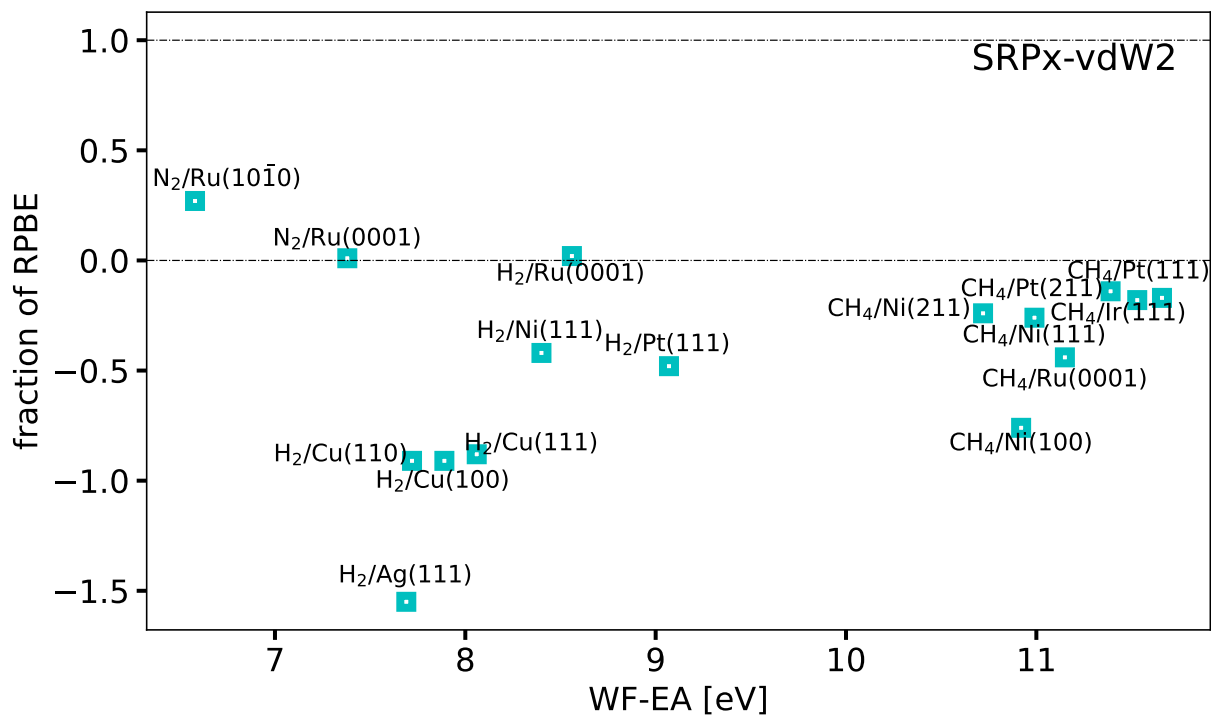

Figure S3: The optimum fraction of RPBE exchange  $x$  is shown as a function of  $\Delta E_{CT}$  for the SRP  $x$ -vdW2 DF (Eq.4). Values falling between the two horizontal dot-dashed black lines could be obtained by the interpolation procedure illustrated in Figure 5.

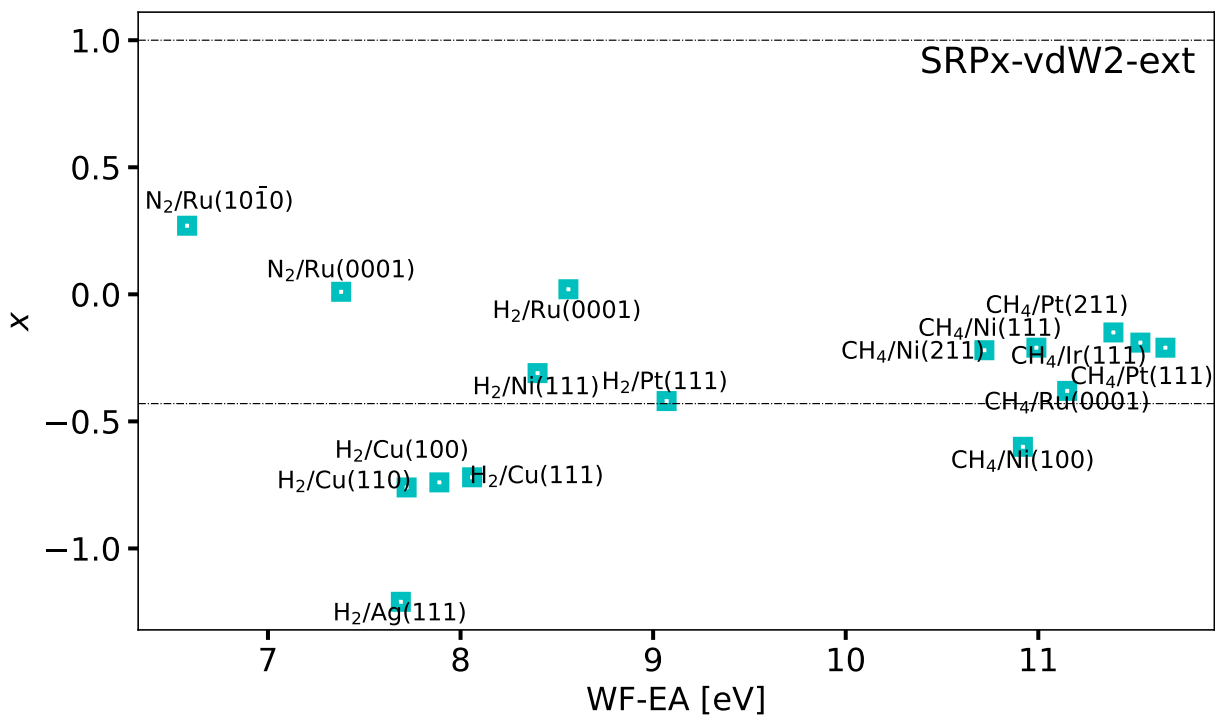

Figure S4: The optimum mixing parameter  $x$  is shown as a function of  $\Delta E_{CT}$  for the SRP $x$ -vdW2-ext DF (Eq.7). Values falling between the two horizontal dot-dashed black lines could be obtained by the interpolation procedure illustrated in Figure 5.

## References

- (1) Haas, P.; Tran, F.; Blaha, P. Calculation of the lattice constant of solids with semilocal functionals. *Phys. Rev. B* **2009**, *79*, 085104.
- (2) Arblaster, J. W. Crystallographic properties of ruthenium. *Platinum Met. Rev.* **2013**, *57*, 127–136.
